# Supplementary material for: Increased expression of the retinoic acid-metabolizing enzyme CYP26A1 during the progression of cervical squamous neoplasia and head and neck cancer
Source: PubMed Central journal article supplement (PMC4198729; doi:10.1186/1756-0500-7-697), 2014-10-07
Supplement: 13104_2014_3230_MOESM1_ESM.pdf [file 13104_2014_3230_MOESM1_ESM.pdf]

Table S1 (supplementary). CYP26A1 expression and the clinical profiles of cases with intraepithelial neoplasia of the cervix

| No. | Age | Sex | Organ  | Classification systems     |                  |                  | CYP26A1<br>expression (%) |
|-----|-----|-----|--------|----------------------------|------------------|------------------|---------------------------|
|     |     |     |        | Dysplasia/CIS <sup>a</sup> | CIN <sup>b</sup> | SIL <sup>c</sup> |                           |
| 1   | 35  | F   | Cervix | Mild dysplasia             | CIN1             | LSIL             | 4                         |
| 2   | 28  | F   | Cervix | Mild dysplasia             | CIN1             | LSIL             | 6                         |
| 3   | 35  | F   | Cervix | Mild dysplasia             | CIN1             | LSIL             | 3                         |
| 4   | 39  | F   | Cervix | Mild dysplasia             | CIN1             | LSIL             | 6                         |
| 5   | 44  | F   | Cervix | Mild dysplasia             | CIN1             | LSIL             | 5                         |
| 6   | 68  | F   | Cervix | Mild dysplasia             | CIN1             | LSIL             | 2                         |
| 7   | 33  | F   | Cervix | Mild dysplasia             | CIN1             | LSIL             | 5                         |
| 8   | 73  | F   | Cervix | Mild dysplasia             | CIN1             | LSIL             | 2                         |
| 9   | 44  | F   | Cervix | Mild dysplasia             | CIN1             | LSIL             | 4                         |
| 10  | 32  | F   | Cervix | Mild dysplasia             | CIN1             | LSIL             | 6                         |
| 11  | 35  | F   | Cervix | Mild dysplasia             | CIN1             | LSIL             | 8                         |
| 12  | 39  | F   | Cervix | Mild dysplasia             | CIN1             | LSIL             | 4                         |

|    |    |   |        |                    |      |      |    |
|----|----|---|--------|--------------------|------|------|----|
| 13 | 41 | F | Cervix | Mild dysplasia     | CIN1 | LSIL | 5  |
| 14 | 19 | F | Cervix | Mild dysplasia     | CIN1 | LSIL | 5  |
| 15 | 34 | F | Cervix | Moderate dysplasia | CIN2 | HSIL | 9  |
| 16 | 36 | F | Cervix | Moderate dysplasia | CIN2 | HSIL | 12 |
| 17 | 65 | F | Cervix | Moderate dysplasia | CIN2 | HSIL | 7  |
| 18 | 39 | F | Cervix | Moderate dysplasia | CIN2 | HSIL | 14 |
| 19 | 34 | F | Cervix | Moderate dysplasia | CIN2 | HSIL | 11 |
| 20 | 40 | F | Cervix | Moderate dysplasia | CIN2 | HSIL | 12 |
| 21 | 25 | F | Cervix | Moderate dysplasia | CIN2 | HSIL | 18 |
| 22 | 44 | F | Cervix | Moderate dysplasia | CIN2 | HSIL | 14 |
| 23 | 28 | F | Cervix | Moderate dysplasia | CIN2 | HSIL | 16 |
| 24 | 35 | F | Cervix | Moderate dysplasia | CIN2 | HSIL | 12 |
| 25 | 76 | F | Cervix | Moderate dysplasia | CIN2 | HSIL | 8  |
| 26 | 34 | F | Cervix | Moderate dysplasia | CIN2 | HSIL | 11 |
| 27 | 35 | F | Cervix | Moderate dysplasia | CIN2 | HSIL | 17 |
| 28 | 34 | F | Cervix | Severe dysplasia   | CIN3 | HSIL | 18 |
| 29 | 45 | F | Cervix | Severe dysplasia   | CIN3 | HSIL | 26 |
| 30 | 46 | F | Cervix | Severe dysplasia   | CIN3 | HSIL | 25 |

|    |    |   |        |                   |      |      |    |
|----|----|---|--------|-------------------|------|------|----|
| 31 | 43 | F | Cervix | Severe dysplasia  | CIN3 | HSIL | 28 |
| 32 | 35 | F | Cervix | Severe dysplasia  | CIN3 | HSIL | 16 |
| 33 | 56 | F | Cervix | Severe dysplasia  | CIN3 | HSIL | 21 |
| 34 | 52 | F | Cervix | Severe dysplasia  | CIN3 | HSIL | 26 |
| 35 | 40 | F | Cervix | Severe dysplasia  | CIN3 | HSIL | 15 |
| 36 | 40 | F | Cervix | Severe dysplasia  | CIN3 | HSIL | 32 |
| 37 | 64 | F | Cervix | Severe dysplasia  | CIN3 | HSIL | 26 |
| 38 | 29 | F | Cervix | Severe dysplasia  | CIN3 | HSIL | 33 |
| 39 | 36 | F | Cervix | Severe dysplasia  | CIN3 | HSIL | 31 |
| 40 | 52 | F | Cervix | Severe dysplasia  | CIN3 | HSIL | 25 |
| 41 | 30 | F | Cervix | Severe dysplasia  | CIN3 | HSIL | 36 |
| 42 | 52 | F | Cervix | Carcinoma in situ | CIN3 | HSIL | 46 |
| 43 | 52 | F | Cervix | Carcinoma in situ | CIN3 | HSIL | 57 |
| 44 | 40 | F | Cervix | Carcinoma in situ | CIN3 | HSIL | 38 |
| 45 | 58 | F | Cervix | Carcinoma in situ | CIN3 | HSIL | 42 |
| 46 | 79 | F | Cervix | Carcinoma in situ | CIN3 | HSIL | 35 |
| 47 | 33 | F | Cervix | Carcinoma in situ | CIN3 | HSIL | 64 |
| 48 | 60 | F | Cervix | Carcinoma in situ | CIN3 | HSIL | 56 |
| 49 | 31 | F | Cervix | Carcinoma in situ | CIN3 | HSIL | 51 |

|    |    |   |        |                                |      |      |    |
|----|----|---|--------|--------------------------------|------|------|----|
| 50 | 53 | F | Cervix | Carcinoma in situ              | CIN3 | HSIL | 48 |
| 51 | 58 | F | Cervix | Carcinoma in situ              | CIN3 | HSIL | 57 |
| 52 | 36 | F | Cervix | Carcinoma in situ              | CIN3 | HSIL | 42 |
| 54 | 35 | F | Cervix | Normal epithelium, match to #1 |      |      | 0  |
| 55 | 28 | F | Cervix | Normal epithelium, match to #2 |      |      | 0  |
| 56 | 35 | F | Cervix | Normal epithelium, match to #3 |      |      | 0  |
| 57 | 39 | F | Cervix | Normal epithelium, match to #4 |      |      | 0  |
| 58 | 44 | F | Cervix | Normal epithelium, match to #5 |      |      | 0  |
| 59 | 68 | F | Cervix | Normal epithelium, match to #6 |      |      | 0  |
| 60 | 33 | F | Cervix | Normal epithelium, match to #7 |      |      | 0  |

---

Abbreviations: <sup>a</sup> CIS, carcinoma in situ; <sup>b</sup> CIN, cervical intraepithelial neoplasia; <sup>c</sup> SIL, squamous intraepithelial lesion.
