# Supplementary material for: Increased expression of the retinoic acid-metabolizing enzyme CYP26A1 during the progression of cervical squamous neoplasia and head and neck cancer
Source: PubMed Central journal article supplement (PMC4198729; doi:10.1186/1756-0500-7-697), 2014-10-07
Supplement: 13104_2014_3230_MOESM2_ESM.pdf [file 13104_2014_3230_MOESM2_ESM.pdf]

Table S2 (supplementary). CYP26A1 expression and the clinical profiles of the cervical cancer tissue microarray

| No. | Age | Sex | Organ  | Diagnosis                              | pTNM     | Stage | Follow-up months | Follow-up results | Cause of death        | CYP26A1 (Score) | p53 | Ki67 labeling index (%) |
|-----|-----|-----|--------|----------------------------------------|----------|-------|------------------|-------------------|-----------------------|-----------------|-----|-------------------------|
| 1   | 70  | F   | Cervix | Squamous cell carcinoma, microinvasive | T1a1N0M0 | IA1   | 176              | dead              | Chronic renal failure | 1               | -   | 5                       |
| 2   | 46  | F   | Cervix | Squamous cell carcinoma, microinvasive | T1a1N0M0 | IA1   | 191              | alive             |                       | 0               | -   | < 5                     |
| 3   | 42  | F   | Cervix | Squamous cell carcinoma, microinvasive | T1a1N0M0 | IA1   | 191              | alive             |                       | 1               | -   | 10                      |
| 4   | 57  | F   | Cervix | Squamous cell carcinoma in situ        | TisN0M0  | 0     | 189              | alive             |                       | 0               | +   | < 5                     |
| 5   | 33  | F   | Cervix | Squamous cell carcinoma, microinvasive | T1a1N0M0 | IA1   | 187              | alive             |                       | 1               | -   | 5                       |
| 6   | 35  | F   | Cervix | Squamous cell carcinoma in situ        | TisN0M0  | 0     | 81               | dead              | Cancer                | 2               | -   | 10                      |
| 7   | 48  | F   | Cervix | Squamous cell carcinoma, microinvasive | T1a1N0M0 | IA1   | 185              | alive             |                       | 0               | -   | < 5                     |
| 8   | 39  | F   | Cervix | Squamous cell carcinoma, microinvasive | T1a1N0M0 | IA1   | 183              | alive             |                       | 1               | -   | 15                      |
| 9   | 58  | F   | Cervix | Squamous cell carcinoma, microinvasive | T1a1N0M0 | IA1   | 178              | dead              | Parkinson's disease   | 0               | -   | 10                      |
| 10  | 53  | F   | Cervix | Squamous cell carcinoma in situ        | TisN0M0  | 0     | 181              | alive             |                       | 1               | +   | 15                      |
| 11  | 53  | F   | Cervix | Squamous cell carcinoma                | T1b2N0M0 | IB2   | 180              | alive             |                       | 1               | -   | < 5                     |
| 12  | 53  | F   | Cervix | Squamous cell carcinoma                | T2bN1M0  | IIIB  | 20               | alive             |                       | 0               | -   | 20                      |
| 13  | 50  | F   | Cervix | Adenocarcinoma                         | T1b2N1M0 | IIIB  | 103              | dead              | Cancer                | 0               | -   | 15                      |
| 14  | 45  | F   | Cervix | Squamous cell carcinoma                | T1b2N1M0 | IIIB  | 0                | lost              |                       | 2               | -   | 10                      |
| 15  | 49  | F   | Cervix | Squamous cell carcinoma                | T1b1N1M0 | IIIB  | 0                | lost              |                       | 2               | -   | 25                      |
| 16  | 35  | F   | Cervix | Squamous cell carcinoma                | T1b1N0M0 | IB1   | 0                | lost              |                       | 1               | -   | 30                      |
| 17  | 57  | F   | Cervix | Squamous cell carcinoma                | T2a1N0M0 | IIA1  | 3                | lost              |                       | 0               | +   | 10                      |
| 18  | 39  | F   | Cervix | Squamous cell carcinoma                | T1b1N0M0 | IB1   | 54               | dead              | Cancer                | 3               | -   | 25                      |
| 19  | 66  | F   | Cervix | Squamous cell carcinoma                | T2a1N1M0 | IIIB  | 190              | dead              | Lung cancer           | 2               | -   | 10                      |
| 20  | 55  | F   | Cervix | Squamous cell carcinoma                | T1b2N0M0 | IB2   | 36               | dead              | Cancer                | 3               | -   | 15                      |
| 21  | 64  | F   | Cervix | Squamous cell carcinoma                | T1b2N1M0 | IIIB  | 131              | dead              | Lung cancer           | 2               | -   | 10                      |
| 22  | 50  | F   | Cervix | Squamous cell carcinoma                | T1b1N0M0 | IB1   | 18               | dead              | Cancer                | 1               | -   | 25                      |
| 23  | 48  | F   | Cervix | Squamous cell carcinoma                | T1b1N1M0 | IIIB  | 165              | alive             |                       | 3               | -   | 25                      |
| 24  | 51  | F   | Cervix | Squamous cell carcinoma                | T1b2N1M0 | IIIB  | 56               | dead              | Cancer                | 2               | -   | 15                      |
| 25  | 54  | F   | Cervix | Squamous cell carcinoma                | T1b1N0M0 | IB1   | 164              | alive             |                       | 0               | -   | 5                       |
| 26  | 39  | F   | Cervix | Squamous cell carcinoma                | T1b1N0M0 | IB1   | 3                | lost              |                       | 2               | -   | 5                       |
| 27  | 58  | F   | Cervix | Squamous cell carcinoma                | T1b1N0M0 | IB1   | 0                | lost              |                       | 1               | -   | 10                      |
| 28  | 57  | F   | Cervix | Squamous cell carcinoma                | T1b1N0M0 | IB1   | 164              | alive             |                       | 0               | +   | < 5                     |
| 29  | 55  | F   | Cervix | Squamous cell carcinoma                | T1b1N0M0 | IB1   | 0                | lost              |                       | 1               | -   | 10                      |
| 30  | 35  | F   | Cervix | Squamous cell carcinoma                | T1b1N1M0 | IIIB  | 162              | alive             |                       | 3               | -   | 30                      |
| 31  | 62  | F   | Cervix | Squamous cell carcinoma                | T1b1N0M0 | IB1   | 161              | alive             |                       | 1               | -   | 15                      |
| 32  | 64  | F   | Cervix | Squamous cell carcinoma                | T1b2N1M0 | IIIB  | 161              | alive             |                       | 0               | +   | 10                      |
| 33  | 60  | F   | Cervix | Adenosquamous carcinoma                | T1b1N0M0 | IB1   | 156              | dead              | Pancreas cancer       | 1               | -   | < 5                     |
| 34  | 43  | F   | Cervix | Squamous cell carcinoma                | T1b1N1M0 | IIIB  | 160              | alive             |                       | 3               | -   | 30                      |
| 35  | 68  | F   | Cervix | Squamous cell carcinoma                | T1b1N0M0 | IB1   | 160              | alive             |                       | 1               | -   | 15                      |

|    |    |   |            |                               |          |      |     |       |                         |   |   |     |
|----|----|---|------------|-------------------------------|----------|------|-----|-------|-------------------------|---|---|-----|
| 36 | 45 | F | Cervix     | Squamous cell carcinoma       | T1b2N0M0 | IB2  | 160 | alive |                         | 3 | - | 15  |
| 37 | 40 | F | Cervix     | Squamous cell carcinoma       | T1b1N0M0 | IB1  | 159 | alive |                         | 2 | - | 25  |
| 38 | 58 | F | Cervix     | Adenosquamous carcinoma       | T1b1N0M0 | IB1  | 158 | alive |                         | 0 | + | 10  |
| 39 | 67 | F | Cervix     | Squamous cell carcinoma       | T1b1N0M0 | IB1  | 157 | alive |                         | 2 | - | 25  |
| 40 | 48 | F | Cervix     | Squamous cell carcinoma       | T1b1N1M0 | IIIB | 157 | alive |                         | 2 | - | 15  |
| 41 | 62 | F | Cervix     | Squamous cell carcinoma       | T1b2N1M0 | IIIB | 0   | dead  | Thrombosis              | 0 | - | 30  |
| 42 | 32 | F | Cervix     | Squamous cell carcinoma       | T1b1N1M0 | IIIB | 17  | dead  | Cancer                  | 0 | - | 20  |
| 43 | 55 | F | Cervix     | Squamous cell carcinoma       | T2a1N1M0 | IIIB | 7   | lost  |                         | 0 | - | 15  |
| 44 | 61 | F | Cervix     | Squamous cell carcinoma       | T2bN1M0  | IIIB | 2   | lost  |                         | 1 | - | 10  |
| 45 | 34 | F | Cervix     | Adenocarcinoma                | T1b2N1M0 | IIIB | 20  | dead  | Cancer                  | 1 | - | 10  |
| 46 | 53 | F | Cervix     | Squamous cell carcinoma       | T1b1N0M0 | IB1  | 176 | alive |                         | 2 | - | 20  |
| 47 | 45 | F | Cervix     | Squamous cell carcinoma       | T1b1N0M0 | IB1  | 165 | alive |                         | 1 | - | < 5 |
| 48 | 65 | F | Cervix     | Squamous cell carcinoma       | T1b1N0M0 | IB1  | 133 | dead  | Cerebrovascular disease | 1 | - | 20  |
| 49 | 47 | F | Cervix     | Squamous cell carcinoma       | T1b1N1M0 | IIIB | 162 | alive |                         | 2 | - | 25  |
| 50 | 59 | F | Cervix     | Adenosquamous carcinoma       | T1b2N1M0 | IIIB | 156 | alive |                         | 3 | - | 10  |
| 51 | 62 | F | Lymph node | Metastatic carcinoma of N0.41 |          |      |     |       |                         | 0 |   |     |
| 52 | 32 | F | Lymph node | Metastatic carcinoma of N0.42 |          |      |     |       |                         | 1 |   |     |
| 53 | 55 | F | Lymph node | Metastatic carcinoma of N0.43 |          |      |     |       |                         | 1 |   |     |
| 54 | 61 | F | Lymph node | Metastatic carcinoma of N0.44 |          |      |     |       |                         | 1 |   |     |
| 55 | 34 | F | Lymph node | Metastatic carcinoma of N0.45 |          |      |     |       |                         | 0 |   |     |
| 56 | 53 | F | Cervix     | Normal of No.46               |          |      |     |       |                         | 0 |   |     |
| 57 | 45 | F | Cervix     | Normal of No.47               |          |      |     |       |                         | 0 |   |     |
| 58 | 65 | F | Cervix     | Normal of No.48               |          |      |     |       |                         | 0 |   |     |
| 59 | 47 | F | Cervix     | Normal of No.49               |          |      |     |       |                         | 0 |   |     |
| 60 |    | F | Blank      | Carbon                        |          |      |     |       |                         |   |   |     |

Abbreviation: pTNM, pathological tumor-node-metastasis
