# Supplementary material for: Increased expression of the retinoic acid-metabolizing enzyme CYP26A1 during the progression of cervical squamous neoplasia and head and neck cancer
Source: PubMed Central journal article supplement (PMC4198729; doi:10.1186/1756-0500-7-697), 2014-10-07
Supplement: 13104_2014_3230_MOESM3_ESM.pdf [file 13104_2014_3230_MOESM3_ESM.pdf]

Table S3 (supplementary). CYP26A1 expression and the clinical profiles of the US Biomax laryngeal and pharyngeal cancer tissue microarray

| No. | Age | Sex | Organ             | Diagnosis                                              | Grade* | pTNM   | Stage | Intensity score | Proportion score | Total score | Note             |
|-----|-----|-----|-------------------|--------------------------------------------------------|--------|--------|-------|-----------------|------------------|-------------|------------------|
| 1   | 61  | F   | Palate            | Squamous cell carcinoma of palate                      | 1      | T1N0M0 | I     | 0               | 0                | 0           |                  |
| 2   | 61  | M   | Lower lip         | Squamous cell carcinoma of lower lip                   | 1      | T1N0M0 | I     | 0               | 0                | 0           |                  |
| 3   | 77  | M   | Lower lip         | Squamous cell carcinoma of lower lip                   | 1      | T1N0M0 | I     | 1               | 1                | 2           |                  |
| 4   | 75  | F   | Upper jaw         | Squamous cell carcinoma of upper jaw                   | N/A    | T1N0M0 | I     | 0               | 0                | 0           |                  |
| 5   | 55  | M   | Tongue            | Squamous cell carcinoma of tongue                      | 1      | T1N0M0 | I     | 0               | 0                | 0           |                  |
| 6   | 67  | M   | Palate            | Squamous cell carcinoma of right palate                | 1      | T2N0M0 | II    | 0               | 0                | 0           |                  |
| 7   | 67  | M   | Larynx            | Squamous cell carcinoma of larynx                      | 1      | T2N0M0 | II    | 1               | 1                | 2           |                  |
| 8   | 70  | M   | Maxillary sinus   | Squamous cell carcinoma of right maxillary sinus       | 1      | T2N0M0 | II    | 2               | 2                | 4           |                  |
| 9   | 40  | M   | Larynx            | Squamous cell carcinoma of larynx                      | 2      | T2N1M1 | IV    | 3               | 2                | 5           | Nuclear staining |
| 10  | 55  | M   | Epiglottis        | Squamous cell carcinoma of epiglottis                  | 2      | T4N0M0 | IV    | 2               | 2                | 4           |                  |
| 11  | 57  | M   | Pharynx           | Squamous cell carcinoma of pharynx                     | 2      | T4N0M0 | IV    | 3               | 2                | 5           |                  |
| 12  | 49  | M   | Gingiva           | Squamous cell carcinoma of left gingiva                | 1      | T4N0M0 | IV    | 1               | 1                | 2           |                  |
| 13  | 50  | M   | Tongue            | Squamous cell carcinoma of root of tongue              | 2      | T3N0M0 | III   | 0               | 0                | 0           |                  |
| 14  | 54  | M   | Upper jaw         | Squamous cell carcinoma of left upper jaw              | 2      | T3N0M0 | III   | 0               | 0                | 0           |                  |
| 15  | 72  | M   | Larynx            | Squamous cell carcinoma of larynx                      | 2      | T2N0M0 | II    | 0               | 0                | 0           |                  |
| 16  | 50  | M   | Tongue            | Squamous cell carcinoma of tongue                      | N/A    | T2N0M0 | II    | 0               | 0                | 0           |                  |
| 17  | 74  | M   | Nose              | Squamous cell carcinoma of nasal root                  | 2      | T2N0M0 | II    | 0               | 0                | 0           |                  |
| 18  | 49  | M   | Larynx            | Squamous cell carcinoma of larynx                      | 2      | T4N1M0 | IV    | 3               | 3                | 6           | Nuclear staining |
| 19  | 50  | M   | Larynx            | Squamous cell carcinoma of larynx                      | 2      | T2N1M0 | III   | 1               | 1                | 2           |                  |
| 20  | 90  | M   | Cheek             | Squamous cell carcinoma of cheek                       | 2      | T2N0M0 | II    | 2               | 2                | 4           | Nuclear staining |
| 21  | 67  | M   | Larynx            | Squamous cell carcinoma of larynx                      | 2      | T3N1M0 | III   | 1               | 1                | 2           |                  |
| 22  | 56  | M   | Epiglottis        | Squamous cell carcinoma of epiglottis                  | 2      | T4N0M0 | IV    | 3               | 2                | 5           |                  |
| 23  | 66  | M   | Laryngeal pharynx | Squamous cell carcinoma of left laryngeal pharynx      | 2      | T3N2M0 | IV    | 2               | 2                | 4           |                  |
| 24  | 58  | M   | Larynx            | Squamous cell carcinoma of larynx                      | 2      | T3N1M1 | IV    | 3               | 3                | 6           |                  |
| 25  | 60  | M   | Tongue            | Squamous cell carcinoma of tongue                      | 3      | T2N0M0 | II    | 0               | 0                | 0           |                  |
| 26  | 67  | M   | Pyriform sinus    | Squamous cell carcinoma of pyriform sinus              | 3      | T2N0M0 | II    | 1               | 1                | 2           |                  |
| 27  | 56  | F   | Nasopharynx       | Squamous cell carcinoma of nasopharynx                 | 3      | T2N0M0 | II    | 1               | 0                | 1           |                  |
| 28  | 48  | M   | Submaxilla        | Squamous cell carcinoma of left submaxilla             | 1      | T2N0M0 | II    | 3               | 2                | 5           |                  |
| 29  | 56  | M   | Laryngeal pharynx | Squamous cell carcinoma of laryngeal pharynx           | 2      | T2N0M0 | II    | 1               | 1                | 2           |                  |
| 30  | 43  | M   | Submaxilla        | Squamous cell carcinoma of right submaxilla            | 2      | T2N0M0 | II    | 0               | 0                | 0           |                  |
| 31  | 70  | M   | Submaxilla        | Squamous cell carcinoma of gingiva of right submaxilla | 2      | T2N0M0 | II    | 2               | 2                | 4           |                  |
| 32  | 61  | F   | Submaxilla        | Squamous cell carcinoma of left submaxilla             | 2      | T2N0M0 | II    | 2               | 2                | 4           |                  |
| 33  | 56  | F   | Oral cavity       | Squamous cell carcinoma of mouse floor                 | 2      | T2N0M0 | II    | 0               | 0                | 0           |                  |
| 34  | 55  | M   | Larynx            | Squamous cell carcinoma of larynx                      | 2      | T3N1M0 | III   | 1               | 1                | 2           |                  |
| 35  | 50  | M   | Larynx            | Squamous cell carcinoma of larynx                      | 2      | T3N1M0 | III   | 1               | 1                | 2           |                  |
| 36  | 49  | M   | Larynx            | Squamous cell carcinoma of larynx                      | 3      | T2N1M0 | III   | 0               | 0                | 0           |                  |
| 37  | 71  | M   | Epiglottis        | Squamous cell carcinoma of epiglottis                  | 2      | T3N1M0 | III   | 1               | 1                | 2           |                  |
| 38  | 50  | F   | Laryngeal pharynx | Squamous cell carcinoma of laryngeal pharynx           | 2      | T2N1M0 | III   | 2               | 2                | 4           |                  |
| 39  | 58  | M   | Pyriform sinus    | Squamous cell carcinoma of pyriform sinus              | 2      | T3N0M0 | III   | 3               | 3                | 6           |                  |
| 40  | 71  | M   | Laryngeal pharynx | Squamous cell carcinoma of laryngeal pharynx           | 2      | T2N1M0 | III   | 1               | 1                | 2           |                  |
| 41  | 61  | M   | Epiglottis        | Squamous cell carcinoma of epiglottis                  | 2      | T2N1M0 | III   | 2               | 2                | 4           | Nuclear staining |

|    |    |   |                   |                                                          |     |        |     |   |   |   |                  |
|----|----|---|-------------------|----------------------------------------------------------|-----|--------|-----|---|---|---|------------------|
| 42 | 44 | M | Laryngeal pharynx | Squamous cell carcinoma of laryngeal pharynx             | 2   | T2N1M0 | III | 2 | 1 | 3 | Nuclear staining |
| 43 | 61 | M | Larynx            | Squamous cell carcinoma of larynx                        | 2   | T3N0M0 | III | 0 | 0 | 0 |                  |
| 44 | 45 | M | Cheek             | Squamous cell carcinoma of right cheek                   | 3   | T2N0M0 | II  | 0 | 0 | 0 |                  |
| 45 | 47 | M | Larynx            | Squamous cell carcinoma of larynx                        | 2   | T2N0M0 | II  | 2 | 2 | 4 | Nuclear staining |
| 46 | 63 | M | Epiglottis        | Squamous cell carcinoma of epiglottis                    | 2   | T3N1M0 | III | 2 | 2 | 4 |                  |
| 47 | 61 | M | Epiglottis        | Squamous cell carcinoma of epiglottis                    | 3   | T2N0M0 | II  | 0 | 0 | 0 |                  |
| 48 | 75 | M | Maxillary sinus   | Squamous cell carcinoma of maxillary sinus               | 3   | T4N0M0 | IV  | 1 | 1 | 2 |                  |
| 49 | 50 | M | Pyriform sinus    | Squamous cell carcinoma of pyriform sinus                | 3   | T2N0M0 | II  | 2 | 3 | 5 |                  |
| 50 | 64 | M | Larynx            | Squamous cell carcinoma of larynx                        | 3   | T2N0M0 | II  | 0 | 0 | 0 |                  |
| 51 | 38 | F | Lower lip         | Squamous cell carcinoma of lower lip                     | N/A | T2N0M0 | II  | 0 | 0 | 0 |                  |
| 52 | 56 | F | Cheek             | Squamous cell carcinoma of cheek                         | 3   | T3N0M0 | III | 0 | 0 | 0 |                  |
| 53 | 42 | F | Nasal sinus       | Squamous cell carcinoma of nasal sinus                   | N/A | T3N0M0 | III | 1 | 1 | 2 |                  |
| 54 | 47 | M | Larynx            | Squamous cell carcinoma of larynx                        | N/A | T2N1M0 | III | 0 | 0 | 0 |                  |
| 55 | 51 | M | Larynx            | Squamous cell carcinoma of larynx                        | 2   | T2N1M0 | III | 2 | 2 | 4 |                  |
| 56 | 38 | M | Pyriform sinus    | Squamous cell carcinoma of pyriform sinus                | N/A | T2N2M0 | IV  | 2 | 2 | 4 |                  |
| 57 | 74 | M | Laryngeal pharynx | Squamous cell carcinoma of laryngeal pharynx             | 3   | T4N0M0 | IV  | 3 | 3 | 6 | Nuclear staining |
| 58 | 48 | M | Laryngeal pharynx | Squamous cell carcinoma of laryngeal pharynx             | 2   | T4N0M0 | IV  | 3 | 3 | 6 | Nuclear staining |
| 59 | 65 | M | Larynx            | Squamous cell carcinoma of larynx                        | 3   | T3N2M0 | IV  | 1 | 1 | 2 |                  |
| 60 | 75 | M | Nasal sinus       | Squamous cell carcinoma of nasal sinus                   | 3   | T4N0M0 | IV  | 2 | 2 | 4 |                  |
| 61 | 32 | F | Maxillary sinus   | Squamous cell carcinoma of maxillary sinus               | N/A | T2N0M0 | II  | 0 | 0 | 0 |                  |
| 62 | 40 | F | Lymph node        | Metastatic mucoepidermoid carcinoma of the neck          | 3   |        |     | 3 | 3 | 6 | Nuclear staining |
| 63 | 67 | M | Lymph node        | Metastatic mucoepidermoid carcinoma of mouth floor       | 3   |        |     | 0 | 0 | 0 |                  |
| 64 | 55 | M | Lymph node        | Metastatic squamous cell carcinoma of left upper gingiva | 2   |        |     | 3 | 3 | 6 | Nuclear staining |
| 65 | 47 | M | Lymph node        | Metastatic squamous cell carcinoma of oral cavity        | 1   |        |     | 1 | 1 | 2 |                  |
| 66 | 49 | M | Lymph node        | Metastatic squamous cell carcinoma of hypoglottis        | 2   |        |     | 2 | 2 | 4 |                  |
| 67 | 53 | M | Lymph node        | Metastatic squamous cell carcinoma of laryngeal pharynx  | 3   |        |     | 3 | 3 | 6 | Nuclear staining |
| 68 | 43 | M | Lymph node        | Metastatic acinic cell carcinoma of the neck             | 3   |        |     | 0 | 0 | 0 |                  |
| 69 | 32 | F | Lymph node        | Metastatic acinic cell carcinoma of the neck             | 1   |        |     | 0 | 0 | 0 |                  |
| 70 | 38 | M | Tongue            | Cancer adjacent normal tongue tissue                     |     |        |     | 0 | 0 | 0 |                  |
| 71 | 28 | M | Tongue            | Normal tongue tissue                                     |     |        |     | 0 | 0 | 0 |                  |
| 72 | 27 | F | Tongue            | Normal tongue tissue                                     |     |        |     | 0 | 0 | 0 |                  |
| 73 | 48 | M | Tongue            | Normal tongue tissue                                     |     |        |     | 0 | 0 | 0 |                  |
| 74 | 42 | F | Tongue            | Normal tongue tissue                                     |     |        |     | 0 | 0 | 0 |                  |
| 75 | 15 | F | Tongue            | Normal tongue tissue                                     |     |        |     | 0 | 0 | 0 |                  |
| 76 | 19 | F | Tongue            | Normal tongue tissue                                     |     |        |     | 0 | 0 | 0 |                  |
| 77 | 35 | M | Tongue            | Normal tongue tissue                                     |     |        |     | 0 | 0 | 0 |                  |
| 78 | 18 | F | Tongue            | Normal tongue tissue                                     |     |        |     | 0 | 0 | 0 |                  |
| 79 | 19 | F | Tongue            | Normal tongue tissue                                     |     |        |     | 0 | 0 | 0 |                  |
| 80 | 28 | M | Pharynx           | Normal pharynx tissue                                    |     |        |     | 0 | 0 | 0 |                  |
| 81 | 55 | F | Liver             | Hepatocellular liver cancer                              | 3   | T3N0M0 | N/A | 3 | 3 | 6 |                  |

\*The grade 1-3 is equivalent to well-differentiated, moderately-differentiated, or poorly differentiated, respectively, under microscope.

Abbreviation: pTNM, pathological tumor-node-metastasis
