# Supplementary material for: Increased expression of the retinoic acid-metabolizing enzyme CYP26A1 during the progression of cervical squamous neoplasia and head and neck cancer
Source: PubMed Central journal article supplement (PMC4198729; doi:10.1186/1756-0500-7-697), 2014-10-07
Supplement: 13104_2014_3230_MOESM4_ESM.pdf [file 13104_2014_3230_MOESM4_ESM.pdf]

Table S4 (supplementary). CYP26A1 expression and the clinical profiles of the Super Bio Chips multiple head and neck carcinoma tissue microarray

| No. | Age | Sex | Organ                  | Diagnosis                                                | Grade* | pTNM   | Stage | Intensity score | Proportion score | Total score | Note             |
|-----|-----|-----|------------------------|----------------------------------------------------------|--------|--------|-------|-----------------|------------------|-------------|------------------|
| 1   | 43  | M   | Larynx, pyriform sinus | Squamous cell carcinoma                                  | 2      | T4N3M0 | IVB   | 0               | 0                | 0           |                  |
| 2   | 55  | M   | Larynx, subglottic     | Squamous cell carcinoma                                  | 2      | T4N0M0 | IVA   | 1               | 1                | 2           |                  |
| 3   | 72  | M   | Larynx, supraglottic   | Squamous cell carcinoma                                  | 2      | T3N0M0 | III   | 3               | 2                | 5           | Nuclear staining |
| 4   | 63  | M   | Esophagus              | Squamous cell carcinoma, basaloid type                   | N/A    | T3N0M0 | III   | 1               | 0                | 1           |                  |
| 5   | 67  | M   | Larynx, transglottic   | Squamous cell carcinoma                                  | 1      | T4N2M0 | IVA   | 2               | 0                | 2           |                  |
| 6   | 63  | M   | Larynx, pyriform sinus | Squamous cell carcinoma                                  | 2      | T3N2M0 | IVA   | 2               | 1                | 3           |                  |
| 7   | 60  | M   | Larynx, supraglottic   | Squamous cell carcinoma                                  | 2      | T4N2M0 | IVA   | 1               | 1                | 2           |                  |
| 8   | 61  | M   | Larynx, glottic        | Squamous cell carcinoma                                  | 2      | T4N0M0 | IVA   | 1               | 1                | 2           |                  |
| 9   | 66  | M   | Larynx, subglottic     | Squamous cell carcinoma                                  | 2      | T4N2M0 | IVA   | 3               | 2                | 5           |                  |
| 10  | 56  | M   | Larynx, glottic        | Squamous cell carcinoma                                  | 1      | T1N0M0 | I     | 2               | 1                | 3           |                  |
| 11  | 62  | M   | Larynx, supraglottic   | Squamous cell carcinoma                                  | 2      | T3N2M0 | IVA   | 3               | 1                | 4           | Nuclear staining |
| 12  | 56  | M   | Larynx, pyriform sinus | Squamous cell carcinoma                                  | 2      | T4N2M0 | IVA   | 2               | 1                | 3           |                  |
| 13  | 54  | M   | Larynx, supraglottic   | Squamous cell carcinoma                                  | 1      | T3N0M0 | III   | 2               | 0                | 2           |                  |
| 14  | 48  | M   | Larynx, transglottic   | Squamous cell carcinoma                                  | 1      | T3N0M0 | III   | 3               | 2                | 5           |                  |
| 15  | 61  | M   | Larynx, supraglottic   | Squamous cell carcinoma                                  | 1      | T3N0M0 | III   | 0               | 0                | 0           |                  |
| 16  | 66  | M   | Soft tissue, neck      | Squamous cell carcinoma, from hypopharynx                | 1      | T4N0M0 | IVA   | 2               | 1                | 3           |                  |
| 17  | 51  | M   | Larynx, supraglottic   | Squamous cell carcinoma                                  | 2      | T4N2M0 | IVA   | 0               | 0                | 0           |                  |
| 18  | 46  | M   | Soft tissue, neck      | Squamous cell carcinoma, from hypopharynx                | N/A    | T3N2M0 | IVA   | 2               | 1                | 3           | Nuclear staining |
| 19  | 52  | M   | Larynx, supraglottic   | Squamous cell carcinoma                                  | 2      | T3N0M0 | III   | 1               | 1                | 2           |                  |
| 20  | 52  | F   | Nasal cavity           | Undifferentiated carcinoma                               | 4      | T4NxM0 | IVA   | 0               | 0                | 0           |                  |
| 21  | 64  | M   | Larynx, transglottic   | Squamous cell carcinoma, basaloid type                   | N/A    | T3N2M0 | IVA   | 0               | 0                | 0           |                  |
| 22  | 28  | F   | Lymph node             | Metastatic undifferentiated carcinoma (from nasopharynx) | 4      | T1N1M0 | II    | 2               | 1                | 3           |                  |
| 23  | 63  | M   | Nasopharynx            | Undifferentiated carcinoma                               | 4      | TxN2M1 | IVC   | 0               | 0                | 0           |                  |
| 24  | 77  | M   | Neck                   | Undifferentiated carcinoma                               | 4      | TxN1M0 | N/A   | 1               | 0                | 0           |                  |
| 25  | 51  | M   | Larynx, transglottic   | Squamous cell carcinoma                                  | 1      | T4N2M0 | IVA   | 2               | 1                | 3           |                  |
| 26  | 67  | F   | Neck                   | Squamous cell carcinoma, from hypopharynx                | 2      | TxN0M0 | N/A   | 2               | 1                | 3           |                  |
| 27  | 59  | M   | Nasal cavity           | Squamous cell carcinoma                                  | 3      | T4N0M0 | IVA   | 1               | 1                | 2           |                  |
| 28  | 55  | M   | Larynx, subglottic     | Squamous cell carcinoma                                  | 2      | T3N0M0 | III   | 2               | 1                | 3           |                  |
| 29  | 60  | M   | Larynx, transglottic   | Squamous cell carcinoma                                  | 1      | T4N0M0 | IVA   | 2               | 1                | 3           |                  |
| 30  | 70  | M   | Oropharynx             | Undifferentiated carcinoma                               | 4      | T1N2M0 | IVA   | 1               | 0                | 1           |                  |
| 31  | 55  | M   | Hypopharynx            | Squamous cell carcinoma                                  | 3      | T4N1M0 | IVA   | 2               | 1                | 3           | Nuclear staining |
| 32  | 62  | M   | Larynx, pyriform sinus | Squamous cell carcinoma                                  | N/A    | T3N0M0 | III   | 0               | 0                | 0           |                  |
| 33  | 48  | M   | Soft tissue, neck      | Squamous cell carcinoma (from larynx)                    | N/A    | T2N1M0 | III   | 1               | 1                | 2           |                  |
| 34  | 66  | M   | Larynx, supraglottic   | Squamous cell carcinoma                                  | 2      | T4N2M0 | IVA   | 2               | 1                | 3           |                  |
| 35  | 58  | M   | Larynx, subglottic     | Squamous cell carcinoma                                  | 1      | T4N0M0 | IVA   | 3               | 2                | 5           | Nuclear staining |
| 36  | 76  | M   | Larynx, supraglottic   | Squamous cell carcinoma                                  | 2      | T3N1M0 | III   | 1               | 1                | 2           |                  |
| 37  | 61  | M   | Larynx, supraglottic   | Squamous cell carcinoma                                  | 1      | T4N2M0 | IVA   | 3               | 2                | 5           |                  |
| 38  | 66  | M   | Submandibular gland    | Undifferentiated carcinoma                               | 4      | T3N2M0 | III   | 1               | 0                | 1           |                  |
| 39  | 54  | M   | Tonsil                 | Squamous cell carcinoma                                  | 3      | T2N2M0 | IVA   | 1               | 0                | 1           |                  |
| 40  | 61  | M   | Nose                   | Squamous cell carcinoma                                  | 3      | T3N0M0 | III   | 1               | 0                | 1           |                  |
| 41  | 65  | M   | Larynx, glottic        | Squamous cell carcinoma                                  | 2      | T3NxM1 | IVC   | 0               | 0                | 0           |                  |

|    |       |   |                        |                                                              |     |        |     |   |   |   |                  |
|----|-------|---|------------------------|--------------------------------------------------------------|-----|--------|-----|---|---|---|------------------|
| 42 | 54    | M | Skin, neck             | Undifferentiated carcinoma, from nasopharynx                 | 4   | T4N2M0 | IVA | 2 | 1 | 3 |                  |
| 43 | 82    | F | Larynx, supraglottic   | Squamous cell carcinoma                                      | 2   | T3N1M0 | III | 0 | 0 | 0 |                  |
| 44 | 56    | M | Larynx, subglottic     | Squamous cell carcinoma                                      | N/A | T4N2M0 | IVA | 1 | 0 | 1 |                  |
| 45 | 75    | M | Larynx, transglottic   | Squamous cell carcinoma                                      | 1   | T4N0M0 | IVA | 3 | 2 | 5 | Nuclear staining |
| 46 | 69    | M | Larynx, glottic        | Squamous cell carcinoma                                      | 3   | T4N2M0 | IVA | 3 | 1 | 4 |                  |
| 47 | 43    | M | Larynx, subglottic     | Squamous cell carcinoma                                      | 2   | T3N0M0 | III | 1 | 0 | 1 |                  |
| 48 | 60    | M | Larynx, glottic        | Squamous cell carcinoma                                      | N/A | T4N0M0 | IVA | 3 | 3 | 6 |                  |
| 49 | 66    | M | Larynx, supraglottic   | Squamous cell carcinoma                                      | 3   | T2N0M0 | II  | 1 | 0 | 1 |                  |
| 50 | 52    | M | Larynx, supraglottic   | Squamous cell carcinoma                                      | N/A | T3N1M0 | III | 1 | 0 | 1 |                  |
| 51 | 58    | M | Larynx, pyriform sinus | Squamous cell carcinoma                                      | N/A | T4N2M0 | IVA | 3 | 1 | 4 |                  |
| 52 | 47    | F | Maxilla                | Undifferentiated carcinoma                                   | 4   | T1N0M0 | I   | 3 | 1 | 4 | Nuclear staining |
| 53 | 65    | M | Larynx, glottic        | Squamous cell carcinoma                                      | 1   | T4N2M0 | IVA | 1 | 1 | 2 |                  |
| 54 | 78    | M | Larynx, supraglottic   | Squamous cell carcinoma                                      | 2   | T3N1M0 | III | 1 | 1 | 2 |                  |
| 55 | 69    | M | Epiglottis             | Squamous cell carcinoma, basaloid type                       | N/A | T2N0M0 | II  | 2 | 0 | 2 |                  |
| 56 | 60    | M | Epiglottis             | Squamous cell carcinoma                                      | 2   | T2N2M0 | IVA | 1 | 1 | 2 |                  |
| 57 | 46    | F | Lymph node, neck       | Metastatic undifferentiated carcinoma (unknown primary site) | 4   | N/A    | N/A | 1 | 1 | 2 |                  |
| 58 | 70    | M | Larynx, glottic        | Squamous cell carcinoma                                      | 3   | T4N2M0 | IVA | 0 | 0 | 0 |                  |
| 59 | 79    | M | Larynx, supraglottic   | Squamous cell carcinoma                                      | 3   | T3N2M0 | IVA | 1 | 0 | 1 |                  |
| 60 | Blank |   | Carbon                 |                                                              |     |        |     |   |   |   |                  |

\*The grade 1-4 is equivalent to well-differentiated, moderately-differentiated, poorly-differentiated, or undifferentiated, respectively, under microscope.

Abbreviation: pTNM, pathological tumor-node-metastasis
